# Supplementary material for: Myotube migration to cover and shape the testis of Drosophila depends on Heartless, Cadherin/Catenin, and myosin II
Source: PubMed Central journal article supplement (PMC5769643; doi:10.1242/bio.025940), 2017-11-09
Supplement: biolopen-6-025940-s1.pdf [file biolopen-6-025940-s1.pdf]

## Suppl Figures and Tables

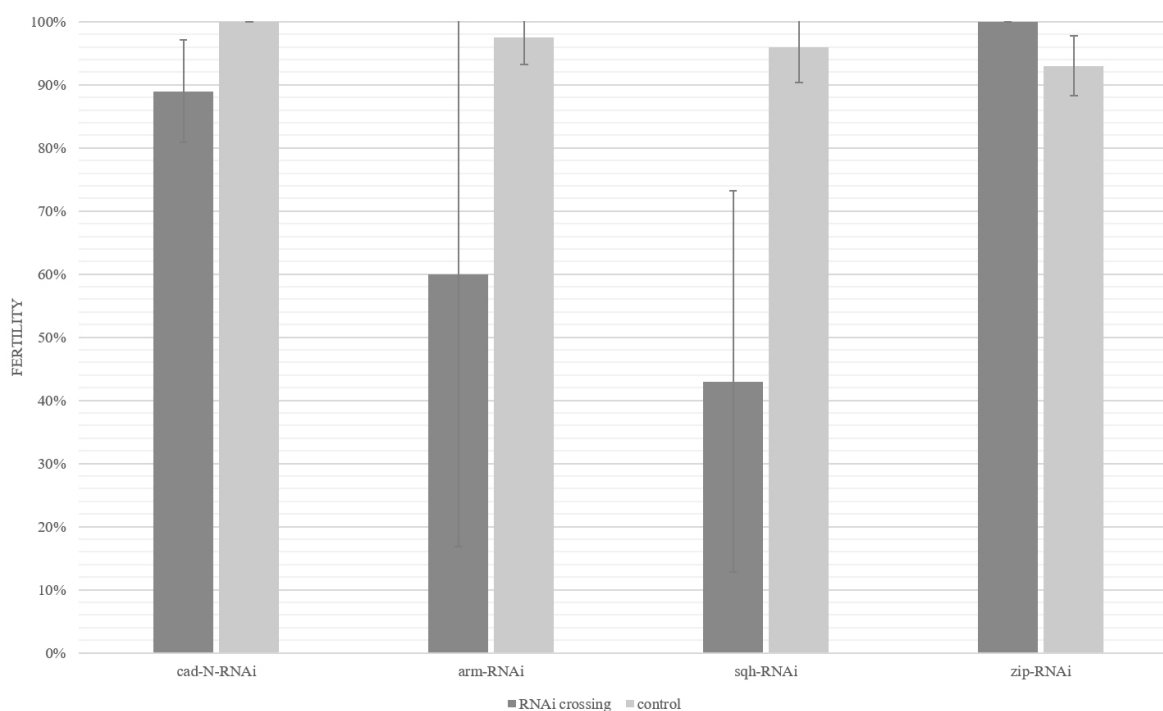

**Figure S1: Fertility of males after RNAi knock-down experiments.** Mef2- or Mef2>>Dcr2-driven RNAi males were crossed with three wild type virgin females. For controls, RNAi males were tested under the same circumstances. Neither *cad-N* knock-down nor *zip* knock-down resulted in reduced male fertility. Fertility of the males was reduced only upon down-regulation of *sqh* and *arm*. n = 30.

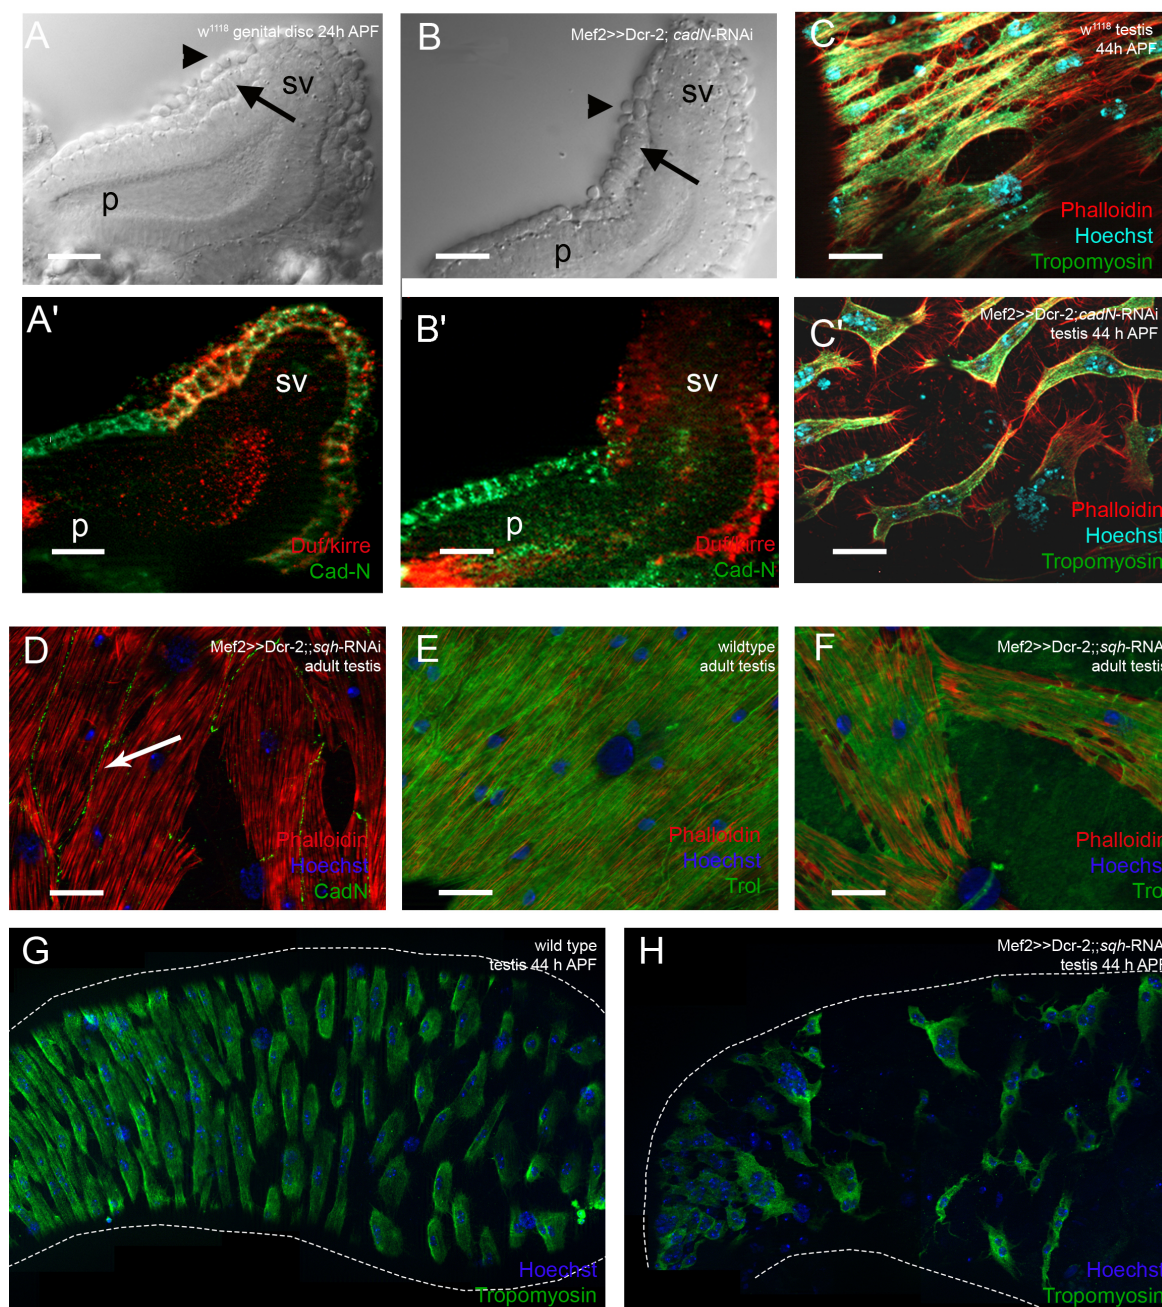

**Figure S2: Reduction of Cad-N or Spaghetti squash does not influence expression of Trol in adult testes but disturbs efficient population of the testes with muscles. (A, B)** Differential interference contrast (DIC) micrograph of testis 44 h APF; 8A'-H: immunofluorescence; Phalloidin (red) labels F-actin, and Hoechst (blue) visualises nuclei. (A) On genital discs of wild type males FC-like (arrow) and FCM-like (arrowhead) myoblasts are visible in interference contrast. (A') The adhesion protein Duf/Kirre was expressed in FC-like

myoblasts on seminal vesicles 24 h APF. B) After knock down of *cad-N*, FC-like (arrow) and FCM-like myoblasts (arrow head) were detectable and B') Duf/Kirre expression was maintained. (C, C' ) At 44 h APF, pupal *cad-N* knock-down testes (C') contain nascent myotubes with less elongated shapes; the number of myotubes might be reduced (compare to C, wild type ). (D) Cad-N was expressed between adjacent myotubes (arrow) in *sqh* knock-down testes. (E) The ECM protein Trol was expressed in the muscle sheath of wild type testes and (F) in the irregular-shaped muscles upon *sqh* knock-down. (G) Pupal wild type testes at 44 h APF. (G) Pupal *sqh* knock-down testes at 44 h APF showed little defects in shape (compare to F), but are covered with fewer nascent myotubes. Scale bars, 20  $\mu$ m.



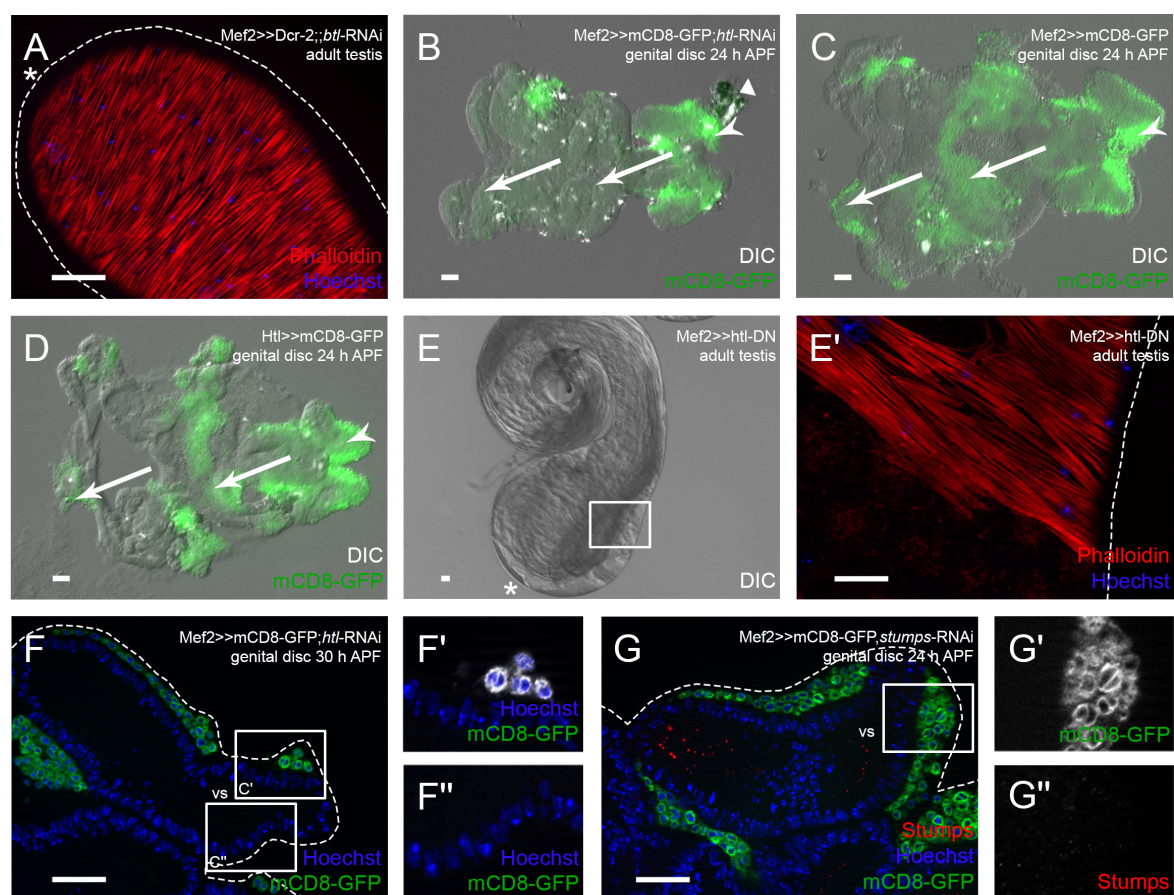

**Figure S3: Analysis of FGF-signaling components** (A) Down-regulation of *htl* did not affect the adult testis muscle sheath. (B) Upon *htl* knock-down, the number of myoblasts on genital discs 24 h APF was severely reduced in the posterior part (compare to C; arrows), whereas testis-relevant myoblasts accumulated over the prospective seminal vesicle. Triangle indicates fat tissue. (C) Myoblasts on genital discs 24 h APF. (D) *Htl*-Gal4 drives expression in posterior myoblasts (arrows) and in testis-relevant myoblasts (arrowhead) on genital discs 24 h APF. (E) Myoblast-specific expression of *Htl*-dominant negative (DN) produced an adult testis with a bulky tip. (E') In the *htl*-DN background, testis muscles did not cover the bulky tips. (F–F'') At 30 h APF, *htl* knock-down (BL35024) seminal vesicles exhibited a severely reduced number of myotubes. F' and F'' show enlargements of the respective boxed areas in F. (G–G'') On *stumps* knock-down genital discs 24 h APF, *Stumps* was not expressed. Phalloidin (red) visualizes F-actin, Hoechst (blue) labels nuclei. On genital discs, myoblasts and nascent myotubes are marked with *Mef2*-driven *mCD8-GFP*. Asterisk marks testis hubs. Dotted lines reflect approximate organ shape. Scale bars, 20 μm.

**Table S1: Phenotypes of RNAi fly lines**

| RNAi fly line                              | Testis phenotype                                                                                                    | Predicted off-targets            |
|--------------------------------------------|---------------------------------------------------------------------------------------------------------------------|----------------------------------|
| Mef2>>Dcr-2; <i>cadN</i> -RNAi<br>v1092    | shape: not coiled properly<br>muscle sheath: not continuous                                                         | none                             |
| Mef2>>Dcr-2; <i>cadN</i> -RNAi<br>v1093*   | shape: not coiled properly<br>muscle sheath: not continuous                                                         | none                             |
| Mef2>> <i>cadN</i> -RNAi<br>v101642        | shape: wt<br>muscle sheath: some holes                                                                              | CadN2                            |
| Mef2>>Dcr-2;; <i>sqh</i> -RNAi<br>BL32439* | shape: small and thickly<br>muscle sheath: not encircling                                                           | none                             |
| Mef2>>Dcr-2;; <i>sqh</i> -RNAi<br>BL33892  | shape: wt<br>muscle sheath: holes                                                                                   | none                             |
| Mef2>>Dcr-2;; <i>zip</i> -RNAi<br>BL36727  | shape: small and thickly<br>muscle sheath: big holes                                                                | none                             |
| Mef2>>Dcr-2; <i>zip</i> -RNAi<br>BL37480*  | shape: coiled with big testis tip<br>muscle sheath: holes                                                           | none                             |
| Mef2>> <i>arm</i> -RNAi<br>BL31304*        | shape: many thickenings<br>muscle sheath: short muscles,<br>holes                                                   | Sequoia (zink finger<br>protein) |
| Mef2>> <i>arm</i> -RNAi<br>BL35004         | shape: wt<br>muscle sheath: wt                                                                                      | none                             |
| Mef2>>Dcr-2;; <i>btl</i> -RNAi<br>BL40871  | shape: wt<br>muscle sheath: wt                                                                                      | none                             |
| Mef2>>Dcr-2; <i>btl</i> -RNAi<br>v27106*   | shape: wt<br>muscle sheath: wt                                                                                      | none                             |
| Mef2>>Dcr-2;; <i>htl</i> -RNAi<br>BL35024  | shape: coiled with big testis tip<br>muscle sheath: no muscles at tip                                               | none                             |
| Mef2>> <i>htl</i> -RNAi v6692*             | shape: small and round, no<br>connection to vs<br>muscle sheath: no muscles                                         | none                             |
| Mef2>> <i>stumps</i> -RNAi<br>v21317*      | shape: variable, small and round,<br>but connected to vs<br>muscle sheath: variable, no<br>muscles at apical region | none                             |

---

|                                       |                                                                                                                     |      |
|---------------------------------------|---------------------------------------------------------------------------------------------------------------------|------|
| Mef2>> <i>stumps</i> -RNAi<br>v105603 | shape: variable, small and round,<br>but connected to vs<br>muscle sheath: variable, big<br>regions without muscles | none |
|---------------------------------------|---------------------------------------------------------------------------------------------------------------------|------|

---

wt = wild type; vs = seminal vesicle; \* = presented in Results
